# Supplementary material for: Pairwise Measures of Causal Direction in the Epidemiology of Sleep Problems and Depression
Source: PLoS One. 2012 Nov 30;7(11):e50841. doi: 10.1371/journal.pone.0050841 (PMC3511346; doi:10.1371/journal.pone.0050841)
Supplement: Text S2 — Technical Information about the Three Causality Statistics. (PDF) [file pone.0050841.s003.pdf]

## Supplementary material on the three causality statistics

This appendix details the three applied pairwise causality statistics. Recall that DirectLiNGAM performs two Ordinary Least Squares regressions: one with  $x_d$  as independent/predicting variable and  $x_s$  as outcome, and another with  $x_s$  as independent and  $x_d$  as the outcome. Then the causal antecedence is determined based-on which one is statistically less dependent of its residuals,  $x_d$  or  $x_s$  (see Methods). If we denote by  $M(x_d, x_s)$  the mutual information between  $x_d$  and regression-residual of  $x_s$  and by  $M(x_s, x_d)$  the mutual information between the opposite configuration, then under the LiNGAM assumptions the inequality  $M(x_d, x_s) < M(x_s, x_d)$  implies that  $x_d$  is the causal antecedent and vice versa. Therefore, we can use the quantity

$$T(x_d, x_s) = M(x_s, x_d) - M(x_d, x_s)$$

as a causality statistic whose positive values indicate that  $x_d$  causes  $x_s$ , whereas the negative values indicate the opposite causality. Since we use the exact same kernel-based pairwise quantity  $M(\cdot, \cdot)$  that the DirectLiNGAM-algorithm uses when deriving causal ordering of variables [2], we call this statistic  $T$  as the DirectLiNGAM-statistic; it aims to use general dependency information in variables. More restricted deviations from Gaussianity can also be used for the causality estimation.

The other statistics that function like  $T$  with respect to positive and negative values are the skewness- and kurtosis-based statistics. These use only some deviations from Gaussian distribution; namely, skewness and kurtosis. Let variables  $x_d$  and  $x_s$  be standardized (mean zero, variance one) and multiplied with the sign of their skewness (resulting in positive skewness), then the desired skewness-based statistics is

$$T_{skew}(x_d, x_s) = \rho(x_d, x_s) E[x_d^2 x_s - x_s^2 x_d],$$

where  $E$  is sample average or expectation, and  $\rho(\cdot, \cdot)$  is the correlation of input variables. The below theorem establishes that under LiNGAM assumptions, a positive value of  $T_{skew}(x_d, x_s)$  indicates that  $x_d$  is cause and a negative value indicates the antecedence of the second argument. The kurtosis-, or sparseness-based, statistic can also be derived, but it suffers from a lack of robustness and from sign-indeterminacy [3]. A hyperbolic tangent function ( $\tanh$ ) offers a more useful approximation [3, 32]. The explicit rationale is beyond present scope, but the ensuing statistic is

$$T_{tanh}(x_d, x_s) = \rho(x_d, x_s) E[x_d \tanh(x_s) - x_s \tanh(x_d)],$$

where the input variables must be standardized. We call this the Tanh-based causality statistic.

$T_{skew}$  and  $T_{tanh}$  apply only to standardized variables, but DirectLiNGAM-based statistic  $T$  can be applied to standardized and non-standardized variables; when everything goes according to assumptions,  $T$  should be invariant with respect to standardization [2]. Therefore we sometimes also provide results for both standardized and original variables in order to directly evaluate the sensitivity for scaling. For standardized random variables  $X_1$ ,  $X_2$ , and  $X_3$  the third cumulant,  $\text{cum}(X_1, X_2, X_3) = E[X_1 X_2 X_3]$ , is multilinear (i.e., linear in each argument). Skewness of a standardized variable  $X$  is  $\text{skew}(X) = \text{cum}(X, X, X)$  [3, 32]. The following theorem is re-stated from previous work [3], and it proves that  $T_{skew}$  has the desired properties; that is, its sign implies the correct causality under the LiNGAM assumptions.

**Theorem.** *Let  $x$  and  $y$  be two standardized variables with positive skewness. If  $y = \rho x + e$ , with independent variables  $x$  and  $e$  and a constant coefficient  $\rho$ , then*

$$T_{skew}(x,y) = skew(x)(\rho^2 - \rho^3), \quad (1)$$

And if the causal direction is opposite,  $x = \rho y + e$ , then

$$T_{skew}(x,y) = skew(y)(\rho^3 - \rho^2). \quad (2)$$

Before proving the theorem, notice that variances of one for  $x$  and  $y$  force  $|\rho| < 1$ , and therefore the theorem implies that  $T_{skew}(x,y)$  is positive when the first argument is cause and negative when the latter argument is the cause, provided the skewnesses of arguments are positive. If a variable  $x^*$  has a negative skewness, then the theorem can nonetheless be applied to  $x = \text{sign}(skew(x^*))x^*$ , which has a positive skewness. In practice,  $\rho$  is the usual correlation coefficient. Notice that  $skew(x) = 0$  when  $x$  is a Gaussian variable.

**Proof.** Given the other assumptions and  $y = \rho x + e$ , we have

$$\begin{aligned} T_{skew}(x,y) &= \rho(x,y)E[x^2y - xy^2] \\ &= \rho[\text{cum}(x,x,\rho x + e) - \text{cum}(x,\rho x + e,\rho x + e)]. \end{aligned}$$

Because of multilinearity of the third cumulant, we obtain that the latter quantity is

$$\begin{aligned} &\rho[\rho \text{cum}(x,x,x) + \text{cum}(x,x,e) - \rho^2 \text{cum}(x,x,x) - 2\rho \text{cum}(x,x,e) - \text{cum}(x,e,e)] \\ &= \rho[\rho skew(x) - \rho^2 skew(x)] = skew(x)(\rho^2 - \rho^3). \end{aligned}$$

This proves the equation 1, and equation 2 results from the symmetry  $T_{skew}(y,x) = -T_{skew}(x,y)$ . The second identity applied the fact that  $\text{cum}(x,x,e) = E[x^2e] = E[x^2]E[e] =$

$0 = E[x]E[e^2] = E[xe^2] = \text{cum}(x, x, e)$  for any square-integrable, standardized, and independent variables  $x$  and  $e$ .

///
